# Supplementary material for: Dual-color plasmonic enzyme-linked immunosorbent assay based on enzyme-mediated etching of Au nanoparticles
Source: PubMed Central journal article supplement (PMC5013390; doi:10.1038/srep32755), 2016-09-07
Supplement: srep32755-s1.pdf [file srep32755-s1.pdf]

## Supporting Information:

### **Dual-color plasmonic enzyme-linked immunosorbent assay based on enzyme-mediated etching of Au nanoparticles**

*Longhua Guo\**, Shaohua Xu, Xiaoming Ma, Bin Qiu, Zhenyu Lin and Guonan Chen

Institute of Nanomedicine and Nanobiosensing; Ministry of Education Key Laboratory of Analysis and Detection Technology for Food Safety; College of Chemistry, Fuzhou University, Fuzhou, 350116, China. Fax: (+) 86-591-22866135

E-mail: [guolh@fzu.edu.cn](mailto:guolh@fzu.edu.cn)

## 1. Calculate the concentration of AuNPs

The concentration of AuNPs was calculated by the previous study<sup>1</sup> according to:

$$C = \frac{A_{450}}{l \times \epsilon_{450}}$$

where C represent the concentration of AuNPs;  $A_{450}$  is the absorption value at 450 nm; l is the optical path of gold sol, and  $\epsilon_{450}$  is molar absorption coefficient of AuNPs at 450 nm.

## 2. Calculate the size of AuNPs

The method of calculate size of AuNPs has been reported early<sup>2</sup>, the equation is following below:

$$d = \begin{cases} 3 + 7.5 \times 10^{-5} X^4, & X < 23 \\ \frac{[\sqrt{X - 17} - 1]}{0.06}, & X \geq 23 \end{cases}$$

where d is the average diameter of AuNPs, and X is datum which can got by the maximum absorption wavelength ( $\lambda_{\max}$ ) minus 500 ( $X = \lambda_{\max} - 500$ ).

### References:

- 1 Haiss, W., Thanh, N. T., Aveyard, J. & Fernig, D. G. Determination of size and concentration of gold nanoparticles from UV-vis spectra. *Anal. Chem.* **79**, 4215-4221 (2007).
- 2 Khlebtsov, N. G. Determination of size and concentration of gold nanoparticles from extinction spectra. *Anal. Chem.* **80**, 6620-6625, doi:10.1021/ac800834n (2008).
